# Supplementary material
Source: Springer Nature journal article supplement (https://www.springermedizin.de/resource/supplementary/12958_2003_119_MOESM2_ESM.pdf/9566160)

**A****NORMAL**

Macrophage

IL-10

IL-6

IL-4

Cytokines

Lumen

Endothelium

Trophoblast cells

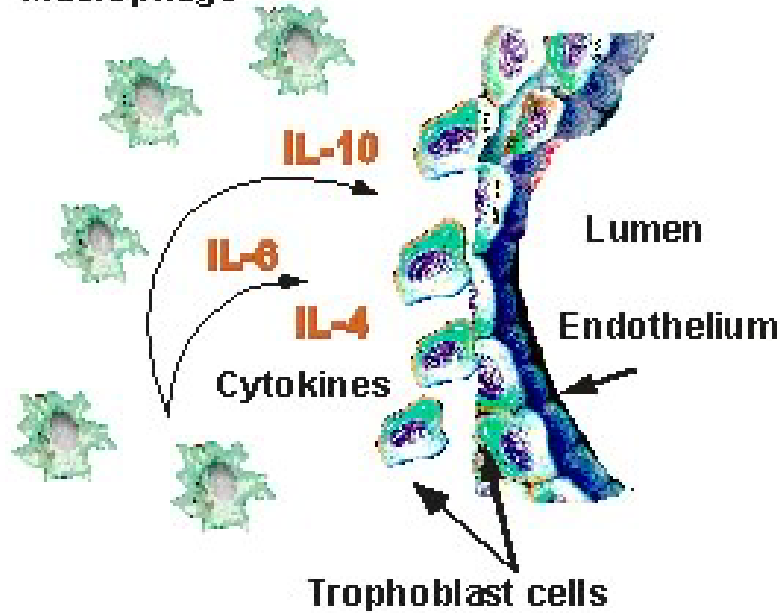**B****IUGR/PREE CLAMPSIA**

Trophoblast cells

Macrophage

TNF- $\alpha$ IFN- $\gamma$ 

Lumen

Endothelium

Apoptosis

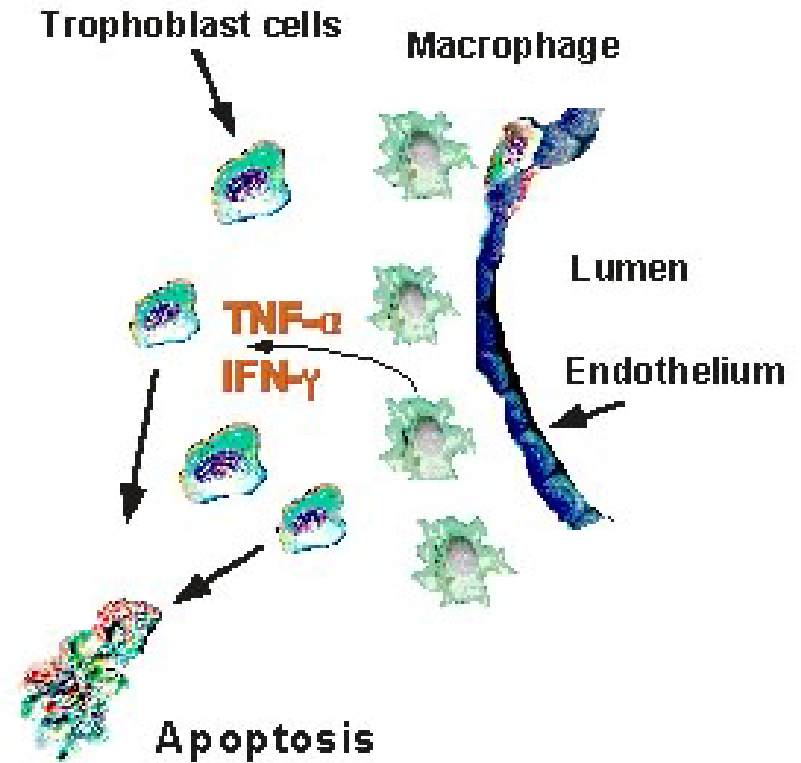

Supplement: MOESM2 [file 9566160]
